1 Full title

2 A single test approach for accurate and sensitive detection and taxonomic characterization of  
3 Trypanosomes by comprehensive analysis of ITS1 amplicons.

4 Short title

5 A single test approach for Trypanosome detection and characterization.

6

7 Alex Gaithuma<sup>1\*</sup>¶, Junya Yamagishi<sup>1\*</sup>¶, Axel Martinelli<sup>2,3</sup>¶, Kyoko Hayashida<sup>1&</sup>, Naoko Kawai<sup>1&</sup>,  
8 Megasari Marsela<sup>1&</sup>, Chihiro Sugimoto<sup>1\*</sup>¶

9

10 <sup>1</sup> Division of Collaboration and Education, Research Center for Zoonosis Control, Hokkaido  
11 University, Sapporo, Japan.

12 <sup>2</sup> GI-CORE, Research Center for Zoonosis Control, Hokkaido University, Sapporo, Japan.

13 <sup>3</sup> Biological and Environmental Sciences and Engineering (BESE) Division, King Abdullah  
14 University of Science and Technology (KAUST), Thuwal, Saudi Arabia.

15

16 \*Corresponding authors

17 E-mail: [junya@czc.hokudai.ac.jp](mailto:junya@czc.hokudai.ac.jp), [akiariegaithuma@gmail.com](mailto:akiariegaithuma@gmail.com), [sugimoto@czc.hokudai.ac.jp](mailto:sugimoto@czc.hokudai.ac.jp)

18

19 ¶These authors contributed equally to this work.

20 &These authors also contributed equally to this work.

21

22

23

24

25

## 26 **Abstract**

27           The World Health Organization has targeted stopping the transmission of Human African  
28 Trypanosomiasis by 2030. To achieve this, better tools are urgently required to identify and  
29 monitor Trypanosome infections in human, animals, and tsetse fly vectors. This study presents a  
30 single test approach for detection and identification of Trypanosomes and their comprehensive  
31 characterization at species and sub-group level. Our method uses newly designed ITS1 PCR  
32 primers (a widely used method for detection of African Trypanosomes, amplifying the ITS1 region  
33 of ribosomal RNA genes) coupled to Illumina sequencing of the amplicon. The protocol is based  
34 on the widely used Illumina's 16s bacterial metagenomic analysis procedure that makes use of  
35 multiplex PCR and dual indexing. We analyzed wild tsetse flies collected from Zambia and  
36 Zimbabwe. Our results show that the traditional method for Trypanosome species detection based  
37 on band size comparisons on a gel is unable to distinguish between *T. vivax* and *T. godfreyi*  
38 accurately. Additionally, this approach shows increased sensitivity of detection at species level.  
39 Through phylogenetic analysis, we identified Trypanosomes at species and sub-group level  
40 without the need for any additional tests. Our results show *T. congolense* Kilifi sub-group is more  
41 closely related to *T. simiae* than to other *T. congolense* sub-groups. This agrees with previous  
42 studies using satellite DNA and 18s RNA analysis. While current classification does not list any  
43 sub-groups for *T. vivax* and *T. godfreyi*, we observed distinct subgroups for these species.  
44 Interestingly, sequences matching *T. congolense* Tsavo (now classified as *T. simiae* Tsavo)  
45 clusters distinctly from the rest of the *T. simiae* Tsavo sequences suggesting that the Nannomonas  
46 group is more divergent than currently thought thus the need for a better classification criteria.  
47 This approach has the potential for refining classification of Trypanosomes and provide detailed  
48 molecular epidemiology information useful for surveillance and transmission control efforts.

## 49 **Author summary**

50           Detection of Trypanosomes in the tsetse flies plays an important role in the control of  
51 African trypanosomiasis by providing information on circulating Trypanosome species in a given  
52 area. We have developed a method that combines multiplex PCR and next-generation sequencing  
53 for Trypanosome species detection. The method is based on the widely used bacterial  
54 metagenomic analysis protocol and uses a modular, two-step PCR process followed by sequencing  
55 of all amplicons in a single run, making sequencing of amplicons more efficient and cost-effective  
56 when dealing with large sample sizes. As part of this approach, we designed novel primers for  
57 amplifying the ITS1 region of the Trypanosome rRNA gene that is more sensitive than  
58 conventional primers. Identification of Trypanosome species is based on BLAST searches against  
59 the constantly updated NCBI's *nt* database, which facilitates the identification of Trypanosome  
60 subgroups. Our approach is more accurate than traditional gel-based analysis and shows how the  
61 latter is prone to misidentification. It is also sensitive and is able to discriminate between  
62 subgroups within Trypanosome species. Applied as an epidemiological tool, it has the potential to  
63 provide new, comprehensive and more accurate information on vector-pathogen-host  
64 interconnections which are key in the control and management of African trypanosomiasis.

## 65 **Introduction**

66           Human African trypanosomiasis or sleeping sickness is classified as a neglected tropical  
67 disease by WHO, that is endemic in sub-Saharan Africa. Human African trypanosomiasis affects  
68 impoverished rural areas of sub-Saharan Africa, where it coexists with animal trypanosomiasis  
69 constituting a major health and economic burden [1]. The disease is caused by protozoan parasites  
70 of the genus *Trypanosoma*, it is transmitted by the bite of blood-sucking tsetse flies (Diptera, genus

71 *Glossina*). The human disease is caused by *Trypanosoma brucei rhodesiense* and *Trypanosoma*  
72 *brucei gambiense*, causing an acute and chronic disease in humans respectively [2]. *T.b.*  
73 *rhodesiense* is found in East Africa and transmitted by *Glossina morsitans*, while *T.b gambiense*  
74 is distributed in West Africa and is mainly transmitted by *Glossina pallidipes* [3–5]. Uganda is the  
75 only country that both forms of the disease occur with the potential for overlapping infections [6].  
76 The incidence of sleeping sickness has over the years, from 26,000 cases reported in 2000 to less  
77 than 8,000 cases reported in 2012 [7]. This decrease is attributed to improved case detection and  
78 treatment and vector management [8]. Despite this decreased incidence, it is estimated that up to  
79 70 million people distributed over 1.5 million km<sup>2</sup> remain at risk of contracting the disease [9].  
80 Besides, African animal trypanosomiasis (AAT) is one of the biggest constraints to livestock  
81 production and a threat to food security in sub-Saharan Africa. The parasites *T. congolense*  
82 (Savannah) and *T. vivax* are considered the most important animal Trypanosomes due to their  
83 predominant distribution in sub-Saharan Africa and their economic impact due to their  
84 predominant distribution in sub-Saharan Africa and their economic impact [10]. They cause  
85 pathogenic infections in cattle (*Nagana*) and also infect sheep, goats, pigs, horses, and dogs. while  
86 *T. brucei brucei* (and *T. brucei rhodesiense*) is pathogenic to camels, horses, and dogs, but causes  
87 mild or no clinical disease cattle, sheep, goats and pigs. *T. simiae* causes a fatal disease in pigs and  
88 mild disease in sheep and goats. *T. godfreyi* shows a chronic, occasionally fatal disease in pigs  
89 experimentally [11,12]. *T. evansi* was originally found to infect camels but it is present in  
90 dromedaries, horses, and other equines as well as in a wide range of animals causing *Surra* disease,  
91 while *T. equiperdum* causes dourine in equines [13]. The latter two species are independent of the  
92 tsetse fly vector [14,15]. They are either transmitted mechanically for *T. evansi* or sexually for *T.*

93 *equiperdum* therefore distributed outside sub-Saharan Africa. Given that Trypanosome parasites  
94 are maintained in wild and domestic animals as reservoirs, this complicates control and measures.

95         The ribosomal RNA (rRNA) sequence region harboring internal transcribed spacer (ITS)  
96 sequences have been used to identify Trypanosome species in hosts and vectors. Epidemiological  
97 and screening studies rely on PCR to amplify the internal transcribed spacer 1 (ITS1) region of  
98 ribosomal genes to analyze Trypanosome species diversity [16–19]. This locus located between  
99 the 18s and 5.8s ribosomal subunit genes with between 100–200 copies [16] and is widely used  
100 to identify Trypanosome species based on amplicon size in a gel. However, identification of *T.b.*  
101 *rhodesiense*, *T.b. gambiense*, *T.b. brucei* or *T. evansi*, specific detection is required. A major  
102 problem with ITS1 PCR besides sensitivity limitations compared to nested PCR, is the fact that  
103 widely used primers for ITS1 PCR amplification have major limitations in their detection capacity  
104 showing bias in detection of some Trypanosome species over others [17,18]. Some are prone to  
105 non-specific amplification particularly in bovine blood samples [19]. When dealing with a large  
106 number of samples either for tsetse fly or animal infection prevalence studies, undertaking  
107 multiple species-specific PCR for each sample is an expensive and a laborious undertaking. Most  
108 often it is preferred to sequence the ITS1 PCR amplicons to confirm species identification in favor  
109 of multiple PCRs, usually by capillary sequencing. Although next-generation sequencing (NGS)  
110 is a well-established method for profiling bacterial communities, with the exception of  
111 *Plasmodium* in mosquitoes, relatively few studies have applied this technology in the diagnostics  
112 of protozoal infections [20,21]. Next-generation sequencing allows high-throughput  
113 parallelization of sequencing reactions, is more sensitive and accurate at single nucleotide  
114 resolution (due to deep sequencing) and is therefore helpful to accurately determine the prevalence  
115 and genetic diversity of Trypanosome species in wildlife communities and potential vectors.

## 116 **Materials and methods**

### 117 **Sample collection and extraction of DNA**

118 Tsetse flies were obtained from Zambia; along the Kafue national park border (n=85,  
119 collected in June 2017) and from Rufunsa area (n=200) near Lower Zambezi National park  
120 (surrounding farms and villages) collected earlier in November and December 2013) (Fig 1). We  
121 also included 188 tsetse flies samples earlier collected from Hurungwe Game reserve in Zimbabwe  
122 between March and April 2014 to expand Trypanosome species spectrum. All flies collected in  
123 this study were caught on public land using Epsilon or customized mobile traps and preserved in  
124 silica gel. The dried flies were transferred to a smashing machine and crushed at 3,000 rpm for 45  
125 sec. DNA was isolated using the DNA Isolation kit for mammalian blood (Roche USA) as per the  
126 manufacturer's protocol with slight modification where solution I (Red blood cell lysis buffer)  
127 was not used. The DNA sample was stored at -80°C until polymerase chain reaction (PCR).

### 128 **Fig 1. Map of Zambia and Zimbabwe showing areas of tsetse fly collection.**

129 Maps sourced from © OpenStreetMap contributors, and made available here under the Open  
130 Database License (ODbL) (<https://opendatacommons.org/licenses/odbl/1.0/>).

### 131 **Primer design and testing**

132 The following sequences were retrieved from NCBI, *Trypanosoma brucei* (JX910378,  
133 JX910373, JN673391, FJ712717, AF306777, AF306774, AF306771 and AB742530),  
134 *Trypanosoma vivax* (JN673394, KC196703 and TVU22316), *Trypanosoma congolense*  
135 (JN673389, TCU22319, TCU22318, TCU22317 and TCU22315), *Trypanosoma simiae*  
136 (JN673387 and TSU22320), *Trypanosoma godfreyi* (JN673385) *Trypanosoma evansi* (D89527),

137 *Trypanosoma otospermophili* (AB175625), and *Trypanosoma grosi* (AB175624). They were  
138 aligned in Geneious 9.1.5 software (Biomatters Ltd, Auckland, New Zealand) using MAFFT  
139 multiple aligner with default settings and ITS1 region identified by comparing annotations and  
140 terminal regions of 18s and 1.5s rRNA regions. Primers flanking the ITS1 region were designed  
141 and manual sequence editing of the primers was done to improve the range of Trypanosome  
142 species and subgroups.

143 The new primers named AITSF and AITSR were analyzed and the expected amplicon  
144 sizes compared with primer pairs of three widely used primers for ITS1 region; CF/BR [18] and  
145 ITS1/ITS2 [22] for specificity range with a computer-based *in silico* PCR analysis by  
146 Simulate\_PCR [23] using the NCBI *nt* database to deduce the scope of Trypanosome species and  
147 subgroups detection and the expected lengths of amplicons (S1 Table). Simulate\_PCR uses  
148 BLAST to search amplicons from a specified database wherein we used a local *nt* database  
149 downloaded from NCBI: <ftp://ftp.ncbi.nlm.nih.gov/blast/db/> on 3<sup>rd</sup> December 2017. The new  
150 primers were tested using two positive controls; stock DNA of known Trypanosome species and  
151 tsetse-derived DNA samples previously confirmed as Trypanosome positive and compared the  
152 band sizes with Simulate\_PCR results. Simulate\_PCR was run using the command;

```
153 simulate_PCR -db <path/to/database> -primers <path/to/primers.fasta> -minlen 100 -maxlen  
154 750 -mm 1 -num_threads 8 -max_target_seq 10000 -genes 1 -extract_amp 1
```

155 We tested the sensitivity of AITSF/AITSR primers against the CF/BR primers to determine  
156 their specificity. The ITS1 sequences; *T. brucei* (AF306774), *T. simiae* (JN673387), *T. vivax*  
157 (KM391828), *T. congolense* (U22317) and *T. godfreyi* (JN673384) were downloaded from NCBI,  
158 synthesized and each insert cloned into a pGEMT-easy vector. Solutions with increasing insert

159 copies were prepared by serial dilution and used as templates for PCR reaction using either  
160 AITSF/AITSR or CF/BR primers. Results were analyzed on 5% Agarose gel.

### 161 Paired-end library preparation

162 A two-step PCR protocol for the library preparation was applied in the multiplex PCR  
163 analysis. We used the newly designed AITSF and AITSR primers ligated to Illumina adapter  
164 sequences (Table 1).

165 **Table 1. Primers used in this study.**

| Description                         | Primer name              | Primer sequence (5'-3')                                          |
|-------------------------------------|--------------------------|------------------------------------------------------------------|
| ITS1 forward primer                 | AITSF                    | CGGAAGTTCACCGATATTGC                                             |
| ITS1 reverse primer                 | AITSR                    | AGGAAGCCAAGTCATCCATC                                             |
| Adapter sequence for forward primer | Illumina adapter forward | ACACTCTTCCCTACACGACGCTCTCCGATCT <sup>a</sup> <b>NN</b> [AITSF]   |
| Adapter sequence for reverse primer | Illumina adapter reverse | GTGACTGGAGTTCAGACGTGTGCTCTCCGATCT <sup>a</sup> <b>NN</b> [AITSR] |

166 <sup>a</sup> [ ] indicate where the adapter is attached to the respective primer

167 ITS1 PCR was done in duplicate for Rufunsa samples to validate Trypanosome detection  
168 results. We also included positive template controls comprising *T. b gambiense*, *T. b rhodesiense*,  
169 and *T. congolense* DNA. An artificial Trypanosome DNA mixture was included to mimic a mixed  
170 infection control. It comprised artificially mixed *T.b. gambiense* and *T. congolense* DNA mixed  
171 in equal proportions. The controls were processed the same as samples from PCR to sequencing.  
172 The first PCR reaction used which were ordered in adapter ligated forms where Illumina adapter  
173 sequences were added to the 5' end of each primer (Table1). Sequencing libraries were prepared  
174 according to the Illumina MiSeq system instructions [24] substituting with the respective primers.



175 The 20  $\mu$ L primary reactions contained 0.5  $\mu$ L of 10  $\mu$ M each of the forward and reverse primers,  
176 10  $\mu$ L of 2X Ampdirect® Plus buffer, 0.16  $\mu$ L of 5 U/ $\mu$ L Taq polymerase (Kapa Biosystems,  
177 Boston, USA), 0.4  $\mu$ L DMSO, and 1  $\mu$ L extracted DNA as a template. The temperature and  
178 cycling profile included incubation at 95°C for 10 min, followed by 37 cycles as follows: 95°C  
179 for 30 sec, annealing at 60 °C (for both ITS1 and blood meal primer sets) for 1 min, 72°C for 2  
180 min, final extension at 72°C for 10 min. The 20  $\mu$ L second PCR reactions contained 1  $\mu$ L of 10  
181  $\mu$ M Illumina dual-index primer mix (i5 and i7 primers), 1.2  $\mu$ L of 25 mM MgCl<sub>2</sub>, 0.4  $\mu$ L of 10  
182 mM each of the dNTPs, 0.1  $\mu$ L of 5 U/ $\mu$ L Taq polymerase, 4  $\mu$ L 5X buffer, and 2  $\mu$ L of the 1/60  
183 diluted primary PCR product as template. The temperature and cycling profile included incubation  
184 at 95°C for 3 min, followed by 11 cycles as follows: 95°C for 30 sec, 61°C for 1 min, 72°C for 2  
185 min, final extension at 72°C for 10 min. A negative template control was included in each set of  
186 PCR reactions. To enable sequencing of all amplicons in this study in one run, we used different  
187 sets of dual index primers for each sample in the second PCR reactions.

## 188 **Library sequencing**

189 The barcoded second PCR products were analyzed in 1.5% agarose gel. Equal volumes of  
190 each sample were pooled into one library. The library pool was purified using the Wizard SV Gel  
191 and PCR Clean-Up System (Promega, Madison, WI, USA) by cutting out bands of interest to  
192 separate them from primer dimers and post PCR reagents. Quantification of each of the library  
193 was done using a Qubit dsDNA HS assay kit and a Qubit fluorometer (ThermoFisher Scientific,  
194 Waltham, MA, USA). The concentration of the library was then adjusted to a final concentration  
195 of 4 nM using nuclease-free water and applied to the MiSeq platform (Illumina, San Diego, CA,  
196 USA). Sequencing was performed using a MiSeq Reagent Kit for 300 base pairs, paired-end  
197 (Illumina, San Diego, CA, USA) and a 20% PhiX DNA spike-in control added to improve the data

198 quality of low diversity samples, such as single PCR amplicons. All controls were also included  
199 in the sequencing library.

200 Data obtained from this study is available at SRA database under the SRA accession  
201 number SRP159480 (<https://www.ncbi.nlm.nih.gov/sra/SRP159480>).

## 202 **Bioinformatics**

203 The analysis followed a workflow (Fig 2) comprising the AMPtk pipeline coupled with  
204 taxonomic identification by BLAST. All commands for analysis were run as a custom script (S1  
205 Text). Briefly, reads were processed using the AMPtk pipeline by; 1) Trimming primers, removal  
206 of sequences less than 100 b.p, and merging pair-end reads. Merging parameters were customized  
207 by editing the AMPtk file `amptklib.py` with the USEARCH options; `fastq_pctid` set to 80,  
208 (minimum %id of alignment), `minhsp` set to 8, and `fastq_maxdiffs` set 10 to limit the number of  
209 mismatches in the alignment to 10. 2) Clustering; the DADA2 denoising algorithm option was  
210 called using the `amptk dada2` command. This algorithm provides a clustering independent method  
211 that attempts to “correct” or “denoise” each sequence to a corrected sequence using statistical  
212 modeling of sequencing errors. AMPtk implements a modified DADA2 algorithm that produces  
213 both the standard “inferred sequences” referred to as amplicon sequence variants (ASVs) output  
214 and also clusters the ASVs into biologically relevant OTUs using the UCLUST algorithm. 3)  
215 Downstream processing of ASVs where ASV table filtering was done to correct for index-bleed  
216 where a small percentage of reads bleed into other samples. This was done by the `amptk filter`  
217 command using 0.005, the default index-bleed percentage. 4) An additional post-clustering ASV  
218 table filtering step was done using the `amptk lulu` command. LULU is an algorithm for removing  
219 erroneous molecular ASVs from community data derived by high-throughput sequencing of  
220 amplified marker genes [25]. LULU identifies errors by combining sequence similarity and co-

221 occurrence patterns yielding reliable biodiversity estimates. 5) Taxonomy was assigned to the final  
222 ASV (OTU) table. ASV taxonomic identification (in this study) was done by BLAST (v2.6.0) [26]  
223 remotely. The BLAST output file was parsed and edited to match the taxonomy header formatting  
224 specified in the AMPtk manual and subsequently used for generating a taxonomy labeled ASV  
225 table.

226 To check the accuracy of the ASVs generated by the AmpTk pipeline, we simulated FASTQ  
227 files generated *in silico* from downloaded sequences used in a previous study [11]. This was done  
228 by running *ArtificialFastqGenerator* [27], to generate paired-end FASTQ files with 1000 reads  
229 per sequence. Real quality scores and simulation of sequencing errors was achieved by using a  
230 pair of FASTQ files from sequencing output of the samples. AmpTk pipeline was then run on the  
231 generated reads. The resultant ASVs were allocated taxonomic identity at species level by BLAST  
232 and then compared to the species identity of parent sequences. All the software used in data  
233 analysis are free under open access licenses.

## 234 **Fig 2. Workflow for read analysis using AMPtk pipeline.**

### 235 **Phylogenetic and statistical analysis**

236 A phylogenetic tree was created from the alignment generated from ASVs obtained after  
237 analysis. Alignments were made with MAFFT [28] using the *mafft-xinsi* option (allowing for  
238 prediction of RNA secondary structure and build a multi-structural alignment) with 1,000  
239 maximum iterations, leaving gappy regions and using kimura 1 option for score matrix. Maximum  
240 likelihood phylogenetic trees were built with RAxML 8.0.26 using the 'GTRCATI' model and  
241 default parameters with 10,000 bootstraps. The tree was visualized and annotated using iTOL

242 (version 4) [29]. Statistical analysis and graphing of data were carried out in GraphPad Prism  
243 version 6.01 for Windows, GraphPad Software, San Diego California USA, [www.graphpad.com](http://www.graphpad.com).

## 244 **Results**

### 245 **Improved primers**

246 We evaluated newly designed primers (AITSF/AITSR) and compared their sensitivity to  
247 conventionally used ITS1 primers; CF/BR primers [18]. PCR performed on pGEMT-easy plasmid  
248 DNA with ITS1 inserts from different Trypanosome species at different dilutions showed that the  
249 new primers were slightly more sensitive (S1 Fig). PCR done using AITSF/AITSR primers were  
250 able to detect as little as  $10^2$  *T. godfreyi* inserts,  $10^3$  *T. simiae*, *T. vivax* and *T. congolense* inserts  
251 and up to  $10^4$  *T. brucei* inserts while CF/BR primers detected  $10^3$  *T. godfreyi* and *T. vivax* inserts  
252 and  $10^4$  *T. simiae* and *T. congolense* inserts.

### 253 **Read data and replicate analysis**

254 Reads generated from amplicon sequencing were of relatively good quality. Apart from  
255 those from Zimbabwe, more than 90% of the reads passed quality filtering in all samples (Table  
256 2). The no. of ASVs generated in replicate runs was slightly different indicating slightly different  
257 detection sensitivities in the replicate PCR runs. Only the forward read was retained for  
258 downstream analysis in reads that did not merge due to either amplicon being longer than 600 b.p  
259 or due to low-quality bases in the overlap bases. This did not affect the final identification of reads  
260 as shown by the simulated data results described later. We analyzed the Rufunsa samples in  
261 replicate and compared the results. Both replicates had similar results in regard to individual  
262 Trypanosome species detection per sample seen in the gel image analysis (Fig 3A) as well as  
263 amplicon read analysis (Fig 3B). The outcome of detection for each of the Trypanosome species

264 and sub-groups in replicate runs was comparable and the Fischer's exact test confirmed that there  
265 was no significant difference ( $P < 0.05$ ) in the number of positive detections in replicate runs (S2  
266 Table).

### 267 **Fig 3. Representative replicate analysis results.**

268 (A) Gel analysis of Rufunsa samples done in replicate showing matching bands per sample. (B)  
269 Amplicon sequence analysis of the same samples in A) showing number of reads detected  
270 per species in each sample.

271 **Table 2. Read data of all samples analyzed.**

| Source of sample | No. of samples | Total no. of reads | Reads after pre-processing (% of total) | Raw ASVs | OTUs (97% clustering of ASVs) | ASVs post-filtering |
|------------------|----------------|--------------------|-----------------------------------------|----------|-------------------------------|---------------------|
| Rufunsa Run A    | 200            | 916,055            | 897,598 (99.8%)                         | 269      | 89                            | 174                 |
| Rufunsa Run B    | 200            | 1,289,667          | 1,248,934 (94.8%)                       | 320      | 95                            | 232                 |
| Kafue            | 85             | 483,589            | 454,799 (91.4%)                         | 131      | 48                            | 56                  |
| Hurungwe         | 188            | 29,798             | 11,247 (79.5%)                          | 137      | 63                            | 116                 |

272 ASVs generated were filtered to remove underrepresented and/or artifact ASVs from the final  
273 taxonomy table.

### 274 **Pipeline validation and accuracy of detection**

275 Simulation of data generated from Trypanosome sequences downloaded from NCBI and  
276 analyzed using the AMPtk (amplicon toolkit) pipeline (version 1.2.4)  
277 (<https://github.com/nextgenusfs/amptk>) showed that amplicon sequence variants (ASVs)  
278 generated by the pipeline as primary units of representing sequence diversity, were more accurate  
279 in correctly inferring the diversity sequences compared to operational taxonomic units (OTUs)

280 derived from clustering sequences at 97% identity (S3 Table). The specificity and precision of  
281 distinguishing between individual sequences of the same Trypanosome species are reflected by  
282 the number of ASVs or OTUs representing each of the different species. For example, only one  
283 OTU was generated for all three *Trypanosoma theileri* sequences, and three OTUs were generated  
284 for seven *Trypanosoma simiae* sequences, while the number of ASVs generated in each case  
285 represented each sequence accurately. The simulated data results indicated that read analysis using  
286 the AMPtk pipeline and ASVs instead of OTUs was suitable for sensitive identification of  
287 Trypanosome reads.

### 288 **Amplicon sequencing improves the sensitivity of detection and reveals errors of detection in** 289 **conventional ITS1 PCR-gel analysis**

290 By comparing gel images after PCR and sequence data, it was observed that the sensitivity  
291 of detection of Trypanosome DNA was increased after sequencing. Samples with bands that were  
292 barely visible after the 1<sup>st</sup> PCR became visible after the 2<sup>nd</sup> PCR and were confirmed as positive  
293 after sequencing (Fig 4A). It was also observed that some *T. godfreyi* and *T. vivax* amplicon bands  
294 were of a relatively similar size and it was difficult to distinguish the two by gel analysis alone  
295 (Fig 4B). Mixed and single infections with multiple and single bands respectively were observed  
296 and confirmed by amplicon sequence analysis. Results for the second PCR using dual-index  
297 primers showed consistency with those of the first PCR. There were no bands visible outside the  
298 expected range indicating the absence of non-specific amplification in both PCR steps. The 1<sup>st</sup>  
299 PCR amplicons were slightly longer than expected sizes due to the adapter sequences (approx. 80  
300 bp) added to the primer, therefore the bands observed corresponded to *T. congolense* (*Kilifi/Forest*  
301 *and Savannah*); 650-800 b.p, *T. brucei*; 520-540 bp, *T. simiae*; 440-500 bp, *T. godfreyi*; 320-400  
302 bp, and *T. vivax*; 290-400 bp.

303 **Fig 4. Representative gel and sequence analysis results.**

304 (A) Arrows showing bands are not visible after the 1st PCR become visible after 2nd PCR. (B)  
305 By gel analysis, amplicon bands of samples 5, 7 and 10 are indistinguishable by size and are  
306 deemed to be all *T. godfreyi* while sequencing reveals that the amplicon of sample 10 is, in fact,  
307 *T. vivax*. Positive controls comprise; Tbg (*T. brucei gambiense*), Tbr (*T. brucei rhodesiense*),  
308 Tb/Tc (an artificial mixture of equal amounts of *T. brucei gambiense* and *T. congolense* DNA).

309 **Trypanosome ITS1 sequences can be used to distinguish between Trypanosome species and**  
310 **subgroups**

311 The accuracy in distinguishing between Trypanosome species and subgroups was analyzed  
312 by phylogenetic analysis of ASV sequences and their species identity allocated by BLAST. ASVs  
313 were named after the accession number of their respective top hit BLAST subject sequence and  
314 area of collection of the sample they originated from. Phylogenetic analysis of all ASVs obtained  
315 from this study showed that ASVs named after same Trypanosome species clustered together  
316 regardless of sample collection location. Sub-clustering into different subgroups of the same  
317 species was also observed (Fig 5). The *Nannomonas* subgenus showed the highest diversity of  
318 sub-clustering where *T. simiae* clustered into two main subgroups; *T. simiae* and *T. simiae Tsavo*.  
319 Two *T. simiae* Tsavo II ASVs from Kafue, with 91% and 97% identity to *T. congolense* Tsavo  
320 (Accession number U22318) recently reviewed and classified as *T. simiae* Tsavo [30,31] clustered  
321 distinctly from the rest of the *T. simiae* Tsavo I ASVs. *T. congolense* ASVs showed the highest  
322 diversity and clustered into three main subgroups; Kilifi, Riverine/Forest, and Savannah. *T.*  
323 *congolense* Savannah represented the most diversity in all the ASVs analyzed from all the samples.  
324 *T. congolense* Kilifi clustered separately and far from *T. congolense* Savannah and Riverine/Forest  
325 subgroups. *T. godfreyi* showed sub-clustering into two main sub-groups while *T. vivax* (belonging

326 to the *Dutonella* subgenus) also clustered into two sub-groups. The *Trypanozoon* subgenus (*T.*  
327 *brucei/T. evansi*) did not show any distinct sub-clustering.

328 **Fig 5. Phylogenetic tree of unique ASVs generated from amplicon sequence data.**

329 A *Bodo caudatus* ITS1 sequence was included as outgroup. Individual Trypanosome species and  
330 subgroups cluster into distinct clades. ASV are named after their respective blast best hit matches.

331 **Prevalence and distribution of Trypanosome species**

332 The prevalence of Trypanosome infection in the Rufunsa area, Zambia, was 25.6%, that  
333 of in the Kafue area, also Zambia, 28.2%, while that of the Hurungwe area, Zimbabwe, was 47.3%.  
334 Flies caught in Rufunsa had the highest prevalence of *T. congolense* while those from Kafue had  
335 the highest prevalence of *T. godfreyi* (Table 3). The highest prevalence of *T. brucei/T. evansi* was  
336 recorded in flies caught in Hurungwe. We did not detect any *T. brucei/ T. evansi* from flies  
337 collected in Kafue. Mixed infections were predominant in flies caught in Rufunsa and Hurungwe  
338 while flies caught in Kafue were predominantly infected with *T. godfreyi* (Fig 6). Only tsetse flies  
339 from the Kafue region were sorted by sex during collection and we observed that the infection rate  
340 in female flies (38.6%) was more than twice that of male flies (17.1%). Additionally, we did not  
341 detect *T. congolense* and *T. vivax* infections in male flies. Flies caught in Hurungwe did not have  
342 single infections with *T. congolense* or *T. godfreyi*.

343 **Fig 6. The distribution of Trypanosome species amongst infected tsetse flies.**

344 TBE = *T. brucei/T. evansi*, TV = *T. vivax*, TS = *T. simiae*, TG = *T. godfreyi*, and TC = *T.*  
345 *congolense*.

346 **Table 3. Prevalence of Trypanosome species infection in caught tsetse flies.**



| Trypanosome species                         | Rufunsa (n=200)          | Kafue (n=85)             | Hurungwe (n=188)         |
|---------------------------------------------|--------------------------|--------------------------|--------------------------|
| <b><i>Trypanozoon</i></b>                   | 6.0%<br>(3.5% - 10.2%)   | 0.00%<br>(0% - 4.3%)     | 45.7%<br>(38.8% - 52.9%) |
| <b><i>T. congolense</i> Forest</b>          | 4.5%<br>(2.4% - 8.3%)    | 1.2%<br>(0.2% - 6.4%)    | 0.0%<br>(0% - 2.0%)      |
| <b><i>T. congolense</i> Kilifi</b>          | 7.5%<br>(4.6% - 12.0%)   | 2.4%<br>(0.7% - 8.2%)    | 4.8%<br>(2.5% - 8.9%)    |
| <b><i>T. congolense</i> Savannah</b>        | 7.5%<br>(4.6% - 12.0%)   | 4.7%<br>(1.9% - 11.5%)   | 39.9%<br>(33.2% - 47.0%) |
| <b><i>T. godfreyi</i></b>                   | 3.0%<br>(1.4% - 6.4%)    | 16.5%<br>(10.1% - 25.8%) | 3.7%<br>(1.8% - 7.5%)    |
| <b><i>T. simiae</i></b>                     | 6.0%<br>(3.5% - 10.2%)   | 5.9%<br>(2.5% - 13.0%)   | 1.1%<br>(0.3% - 3.8%)    |
| <b><i>T. simiae</i> Tsavo</b>               | 8.7%<br>(4.5% - 16.2%)   | 2.4%<br>(0.7% - 8.2%)    | 0.0%<br>(0% - 2.0%)      |
| <b><i>T. vivax</i></b>                      | 7.5%<br>(4.6% - 12.0%)   | 2.4%<br>(0.7% - 8.2%)    | 29.2%<br>(23.2% - 36.1%) |
| <b>Trypanosoma<br/>(overall prevalence)</b> | 26.5%<br>(20.9% - 33.0%) | 28.2%<br>(19.8% - 38.6%) | 47.3%<br>(40.3% - 54.5%) |

347 Confidence levels at 95% for apparent prevalence (Wilson) are shown in brackets.

## 348 Discussion

349 This study reports a new and versatile approach for detection of Trypanosome DNA in  
350 samples with high sensitivity and precision than conventional PCR-gel approach. We have  
351 established that conventional ITS PCR gel analysis is not an accurate way of determining the  
352 prevalence of Trypanosome species infections since identification of species by band size is  
353 inaccurate and may lead to misidentification of some Trypanosome species. Apart from the  
354 *Trypanozoon* group (*T. brucei* and *T. evansi*) which are extensively similar at the genome level

355 [32], our new approach is sensitive at the subgroup level and has a high capacity to process large  
356 amounts of samples in one run (approximately a 700 samples mixed library) owing to the high  
357 repertoire of Illumina dual indexing primers. As part of this work, we have also developed new  
358 primers that are more sensitive than conventional primers and cover a wider range of the  
359 *Trypanosoma* genus. With our approach, it is now possible to identify species and subgroups of  
360 Trypanosomes by sequence analysis on individual samples as opposed to pooled samples for a  
361 large dataset which allows for the detection of new isolates. It is also possible to make a better  
362 inference of the Trypanosome species circulating in an area. This approach is a practical and, with  
363 the decreasing cost of next-generation sequencing, cost-effective way to monitor large field  
364 samples of all kinds. They can, therefore, be utilized in a wide range of samples from vectors and  
365 hosts and the analysis of new Trypanosome species.

366         The results obtained in this study indicate that *T. vivax* and *T. godfreyi* have very similarly  
367 sized ITS1 amplicons making it difficult to identify one from the other based solely on gel band  
368 sizes. Sequencing and clustering of the reads effectively address this issue.

369         Phylogenetic analysis shows several interesting population substructures in the cases of *T.*  
370 *simiae* and *T. congolense*. Within the *T. congolense* clade, Savannah and Riverine/Forest  
371 subgroups show more sequence similarity while the Kilifi type shows more divergence. This  
372 agrees with a previous study that found *T. congolense* Savannah and Riverine/Forest had 71%  
373 similarity in satellite DNA sequence [33] and that the Kilifi subgroup was as divergent from other  
374 *T. congolense* subgroups [34]. The clustering of *T. congolense* Kilifi close to *T. simiae* species  
375 than other *T. congolense* subgroups is quite interesting in that an earlier study had identified a new  
376 *T. congolense* Tsavo strain (Accession number U22318) [35] which has been classified as *T.*  
377 *simiae* Tsavo [36]. We identified two ASVs from Kafue area (classified as *T. simiae* Tsavo II in

378 this study) that had 91% and 97% identity to the U22318 *T. congolense* Tsavo sequence and that  
379 clustered with *T. simiae* Tsavo rather than other *T. congolense* species sequences supporting the  
380 *T. simiae* Tsavo classification. However, they cluster separately from the other *T. simiae* Tsavo  
381 ASVs, suggesting that they may have a divergent genotype. Perhaps there is a complex  
382 relationship between *T. congolense* and *T. simiae* species yet to be identified.

383         Prevalence of Trypanosome differed between the sampled areas with single and mixed  
384 infection being detected in flies caught agreeing with previous studies [20,37,38]. This may be an  
385 important factor in the exchange of information between species. We also observed that the  
386 infection rate of female tsetse flies was twice that of male flies. This result is in contrast with  
387 experimental studies using laboratory maintained tsetse flies that found males being more  
388 susceptible than females [39–41].

389         To conclude, our results imply that with the new primers, it is possible to detect and  
390 distinguish between different Trypanosome species and subgroups accurately and therefore infer  
391 prevalence of infection more precisely using a single test without having to undertake satellite  
392 DNA analysis that requires species-specific primers. This is made possible by deep sequencing  
393 which enables resolution at a single nucleotide level. This high resolution at sub-cluster level  
394 utilizing only the ITS1 region has not been shown before thus a practical and sensitive barcoding  
395 of African trypanosomes. Using our approach, it is thus possible to distinguish *T. godfreyi* from  
396 *T. vivax*, as well as highlight finer subpopulation structures within the *T. simiae* and *T. congolense*  
397 clades that raise interesting questions regarding their classification. It is highly likely that there  
398 are genomic and taxonomic differences between *T. vivax*, *T. godfreyi* and *T. congolense* sub-  
399 groups that need to be studied. This could provide answers on the evolution of Trypanosomes.  
400 What contribution do these Trypanosome subgroups make to livestock disease? Are these

401 genotypes responsible for assumed “strain” differences in drug response? Can these new  
402 genotypes be correlated with the old morphological criteria and species designations? Do these  
403 “strains” have the potential of evolving to new subgroups that could pose new risks? There is a  
404 need for more studies to catch up with the molecular taxonomy to answer these questions.

## 405 **Acknowledgements**

406 We wish to acknowledge Mr. Lambert Gwenhure for his assistance in obtaining samples  
407 from Zimbabwe as well as staff of Hokudai Center for Zoonosis Control in Zambia (HCZCZ) for  
408 their help during collection of samples in Zambia.

## 409 **References**

- 410 1. WHO. Investing to overcome the global impact of neglected tropical diseases: third WHO  
411 report on neglected diseases 2015. Invest to overcome Glob impact neglected Trop Dis  
412 third WHO Rep neglected Dis. 2015; 191. doi:ISBN 978 92 4 156486 1
- 413 2. Médecins SF. Sleeping sickness or Human African Trypanosomiasis Fact sheet. 2004  
414 [cited 27 Feb 2018]. Available: [http://www.accessmed-](http://www.accessmed-msf.org/fileadmin/user_upload/diseases/other_diseases/sleepingsicknessfs.pdf)  
415 [msf.org/fileadmin/user\\_upload/diseases/other\\_diseases/sleepingsicknessfs.pdf](http://www.accessmed-msf.org/fileadmin/user_upload/diseases/other_diseases/sleepingsicknessfs.pdf)
- 416 3. Levine ND. The Trypanosomes of Mammals. A Zoological Monograph. Cecil A. Hoare.  
417 Blackwell, Oxford, England, 1972 (U.S. distributor, Davis, Philadelphia). xviii, 750 pp. +  
418 plates. Science (80- ). 1973;179: 60. Available:  
419 <http://science.sciencemag.org/content/179/4068/60.abstract>
- 420 4. World Health Organization. Control and surveillance of human African trypanosomiasis.  
421 World Health Organ Tech Rep Ser. 2013; 1–237.

- 422 5. Grébaud P, Melachio T, Nyangmang S, Eyenga VE o., Njitchouang GR, Ofon E, et al.  
423 Xenomonitoring of sleeping sickness transmission in Campo (Cameroon). *Parasites and*  
424 *Vectors*. *Parasites & Vectors*; 2016;9: 1–9. doi:10.1186/s13071-016-1479-4
- 425 6. Berrang-Ford L, Waltner-Toews D, Charron D, Odiit M, McDermott J, Smit B. Sleeping  
426 sickness in southeastern Uganda: A systems approach. *Ecohealth*. 2005;2: 183–194.  
427 doi:10.1007/s10393-005-6331-9
- 428 7. Franco JR, Simarro PP, Diarra A, Jannin JG. Epidemiology of human African  
429 trypanosomiasis. *Clin Epidemiol*. 2014;6: 257–275. doi:10.2147/CLEP.S39728
- 430 8. Simarro PP, Jannin J, Cattand P. Eliminating human African trypanosomiasis: Where do  
431 we stand and what comes next? *PLoS Med*. 2008;5: 0174–0180.  
432 doi:10.1371/journal.pmed.0050055
- 433 9. Simarro PP, Cecchi G, Franco JR, Paone M, Diarra A, Ruiz-Postigo JA, et al. Estimating  
434 and Mapping the Population at Risk of Sleeping Sickness. Ndung'u JM, editor. *PLoS*  
435 *Negl Trop Dis*. 2012;6: e1859. doi:10.1371/journal.pntd.0001859
- 436 10. Morrison LJ, Vezza L, Rowan T, Hope JC. Animal African Trypanosomiasis: Time to  
437 Increase Focus on Clinically Relevant Parasite and Host Species. *Trends in Parasitology*.  
438 2016. pp. 599–607. doi:10.1016/j.pt.2016.04.012
- 439 11. Auty H, Anderson NE, Picozzi K, Lembo T, Mubanga J, Hoare R, et al. Trypanosome  
440 Diversity in Wildlife Species from the Serengeti and Luangwa Valley Ecosystems. *PLoS*  
441 *Negl Trop Dis*. 2012;6: e1828. doi:10.1371/journal.pntd.0001828
- 442 12. Adams ER, Hamilton PB, Gibson WC. African trypanosomes: Celebrating diversity.

- 443 Trends Parasitol. Elsevier Ltd; 2010;26: 324–328. doi:10.1016/j.pt.2010.03.003
- 444 13. Desquesnes M, Holzmuller P, Lai DH, Dargantes A, Lun ZR, Jittaplapong S.  
445 Trypanosoma evansi and surra: A review and perspectives on origin, history, distribution,  
446 taxonomy, morphology, hosts, and pathogenic effects. Biomed Res Int. 2013;2013.  
447 doi:10.1155/2013/194176
- 448 14. Lai D-H, Hashimi H, Lun Z-R, Ayala FJ, Lukes J. Adaptations of Trypanosoma brucei to  
449 gradual loss of kinetoplast DNA: Trypanosoma equiperdum and Trypanosoma evansi are  
450 petite mutants of T. brucei. Proc Natl Acad Sci. 2008;105: 1999–2004.  
451 doi:10.1073/pnas.0711799105
- 452 15. Lun ZR, Desser SS. Is the broad range of hosts and geographical distribution of  
453 Trypanosoma evansi attributable to the loss of maxicircle kinetoplast DNA? Parasitol  
454 Today. Elsevier Current Trends; 1995;11: 131–133. doi:10.1016/0169-4758(95)80129-4
- 455 16. Hernández P, Martín-Parras L, Martínez-Robles ML, Schwartzman JB. Conserved  
456 features in the mode of replication of eukaryotic ribosomal RNA genes. EMBO J.  
457 1993;12: 1475–85. Available:  
458 [http://www.pubmedcentral.nih.gov/articlerender.fcgi?artid=413359&tool=pmcentrez&ren](http://www.pubmedcentral.nih.gov/articlerender.fcgi?artid=413359&tool=pmcentrez&rendertype=abstract)  
459 [dertype=abstract](http://www.pubmedcentral.nih.gov/articlerender.fcgi?artid=413359&tool=pmcentrez&rendertype=abstract)
- 460 17. Desquesnes M, McLaughlin G, Zoungrana A, Dávila AMR. Detection and identification  
461 of Trypanosoma of African livestock through a single PCR based on internal transcribed  
462 spacer 1 of rDNA. Int J Parasitol. 2001;31: 610–614. doi:10.1016/S0020-7519(01)00161-  
463 8
- 464 18. Njiru ZK, Constantine CC, Guya S, Crowther J, Kiragu JM, Thompson RCA, et al. The

- 465 use of ITS1 rDNA PCR in detecting pathogenic African trypanosomes. *Parasitol Res.*  
466 2005;95: 186–192. doi:10.1007/s00436-004-1267-5
- 467 19. Tran T, Napier G, Rowan T, Cordel C, Labuschagne M, Delespaux V, et al. Development  
468 and evaluation of an ITS1 “Touchdown” PCR for assessment of drug efficacy against  
469 animal African trypanosomosis. *Vet Parasitol. Elsevier*; 2014;202: 164–170.  
470 doi:10.1016/j.vetpar.2014.03.005
- 471 20. Barbosa AD, Gofton AW, Paparini A, Codello A, Greay T, Gillett A, et al. Increased  
472 genetic diversity and prevalence of co-infection with *Trypanosoma* spp. in koalas  
473 (*Phascolarctos cinereus*) and their ticks identified using next-generation sequencing  
474 (NGS). Yurchenko V, editor. *PLoS One. Public Library of Science*; 2017;12: e0181279.  
475 doi:10.1371/journal.pone.0181279
- 476 21. Paparini A, Gofton A, Yang R, White N, Bunce M, Ryan UM. Comparison of Sanger and  
477 next generation sequencing performance for genotyping *Cryptosporidium* isolates at the  
478 18S rRNA and actin loci. *Exp Parasitol. Academic Press*; 2015;151–152: 21–27.  
479 doi:10.1016/j.exppara.2015.02.001
- 480 22. Cox A, Tilley A, McOdimba F, Fyfe J, Eisler M, Hide G, et al. A PCR based assay for  
481 detection and differentiation of African trypanosome species in blood. *Exp Parasitol.*  
482 Centre for Tropical Veterinary Medicine, Royal (Dick) School of Veterinary Medicine,  
483 University of Edinburgh, Easter Bush, Roslin, Midlothian EH25 9RG, Scotland, UK.;  
484 2005;111: 24–29. doi:10.1016/j.exppara.2005.03.014
- 485 23. Gardner SN, Slezak T. Simulate\_PCR for amplicon prediction and annotation from  
486 multiplex, degenerate primers and probes. *BMC Bioinformatics.* 2014;15: 2–7.

- 487           doi:10.1186/1471-2105-15-237
- 488   24.    Illumina. 16S Metagenomic Sequencing Library Preparation. Illumina.com. 2013; 1–28.  
489           Available: [http://support.illumina.com/content/dam/illumina-](http://support.illumina.com/content/dam/illumina-support/documents/documentation/chemistry_documentation/16s/16s-metagenomic-library-prep-guide-15044223-b.pdf)  
490           [support/documents/documentation/chemistry\\_documentation/16s/16s-metagenomic-](http://support.illumina.com/content/dam/illumina-support/documents/documentation/chemistry_documentation/16s/16s-metagenomic-library-prep-guide-15044223-b.pdf)  
491           [library-prep-guide-15044223-b.pdf](http://support.illumina.com/content/dam/illumina-support/documents/documentation/chemistry_documentation/16s/16s-metagenomic-library-prep-guide-15044223-b.pdf)
- 492   25.    Frøslev TG, Kjøller R, Bruun HH, Ejrnæs R, Brunbjerg AK, Pietroni C, et al. Algorithm  
493           for post-clustering curation of DNA amplicon data yields reliable biodiversity estimates.  
494           Nat Commun. Springer US; 2017;8. doi:10.1038/s41467-017-01312-x
- 495   26.    Camacho C, Coulouris G, Avagyan V, Ma N, Papadopoulos J, Bealer K, et al. BLAST+:  
496           Architecture and applications. BMC Bioinformatics. 2009;10: 1–9. doi:10.1186/1471-  
497           2105-10-421
- 498   27.    Frampton M, Houlston R. Generation of Artificial FASTQ Files to Evaluate the  
499           Performance of Next-Generation Sequencing Pipelines. PLoS One. 2012;7.  
500           doi:10.1371/journal.pone.0049110
- 501   28.    Kato H, Standley DM. MAFFT multiple sequence alignment software version 7:  
502           Improvements in performance and usability. Mol Biol Evol. 2013;30: 772–780.  
503           doi:10.1093/molbev/mst010
- 504   29.    Letunic I, Bork P. Interactive Tree of Life v2: Online annotation and display of  
505           phylogenetic trees made easy. Nucleic Acids Res. 2011;39: 475–478.  
506           doi:10.1093/nar/gkr201
- 507   30.    Gibson WC, Stevens JR, Mwendia CMT, Makumi JN, Ngotho JM, Ndung'u JM.



- 508 Unravelling the phylogenetic relationships of African trypanosomes of suids.  
509 Parasitology. 2001; doi:10.1017/S0031182001007880
- 510 31. Gibson W. Species concepts for trypanosomes : from morphological to molecular.  
511 Kinetoplastid Biol Dis. 2003;6: 1–6.
- 512 32. Carnes J, Anupama A, Balmer O, Jackson A, Lewis M, Brown R, et al. Genome and  
513 Phylogenetic Analyses of *Trypanosoma evansi* Reveal Extensive Similarity to *T. brucei*  
514 and Multiple Independent Origins for Dyskinetoplasty. PLoS Negl Trop Dis. 2015;9:  
515 e3404. doi:10.1371/journal.pntd.0003404
- 516 33. Garside LH, Gibson WC. Molecular characterization of trypanosome species and  
517 subgroups within subgenus *Nannomonas*. Parasitology. 1995;  
518 doi:10.1017/S0031182000081853
- 519 34. Masiga DK, Smyth AJ, Hayes P, Bromidge TJ, Gibson WC. Sensitive detection of  
520 trypanosomes in tsetse flies by DNA amplification. Int J Parasitol. 1992;22: 909–918.  
521 doi:10.1016/0020-7519(92)90047-O
- 522 35. Majiwa PAO, Maina M, Waitumbi JN, Mihok S, Zweygarth E. *Trypanosoma*  
523 (*Nannomonas*) *congolense*: Molecular characterization of a new genotype from Tsavo,  
524 Kenya. Parasitology. 1993;106: 151–162. doi:10.1017/S0031182000074941
- 525 36. Urakawa, T. , Majiwa, P. , Hirumi H. Comparative analyses of ribosomal RNA genes of  
526 African and related trypanosomes, including *Trypanosoma evansi*. J Protozool Res.  
527 1998;8: 224–226.
- 528 37. Peacock L, Ferris V, Bailey M, Gibson W. Dynamics of infection and competition

- 529 between two strains of *Trypanosoma brucei brucei* in the tsetse fly observed using  
530 fluorescent markers. *Kinetoplastid Biol Dis.* 2007;6: 4. doi:10.1186/1475-9292-6-4
- 531 38. Lehane MJ, Msangi AR, Whitaker CJ, Lehane SM. Grouping of trypanosome species in  
532 mixed infections in *Glossina pallidipes*. *Parasitology.* 2000;120: 583–592.  
533 doi:10.1017/S0031182099005983
- 534 39. Peacock L, Ferris V, Bailey M, Gibson W. The influence of sex and fly species on the  
535 development of trypanosomes in tsetse flies. Bates PA, editor. *PLoS Negl Trop Dis.*  
536 *Public Library of Science;* 2012;6: e1515. doi:10.1371/journal.pntd.0001515
- 537 40. Mooloo SK, Sabwa CL, Kabata JM. Vector competence of *Glossina pallidipes* and *G.*  
538 *morsitans centralis* for *Trypanosoma vivax*, *T. congolense* and *T. b. brucei*. *Acta Trop.*  
539 1992; doi:10.1016/0001-706X(92)90045-Y
- 540 41. Ashcroft MT. The sex ratio of infected flies found in transmission experiments with  
541 *Glossina morsitans* and *Trypanosoma rhodesiense* and *T. brucei*. *Trans R Soc Trop Med*  
542 *Hyg.* 1959; doi:10.1016/0035-9203(59)90040-9

543 **S1 Fig. Sensitivity of AITSF/AITR primers compared to CF/BR primers in the detection of**  
544 **Trypanosome ITS1 inserts cloned in the pGEMT-easy vector.**

545 **S1 Text. Script with all commands used to run the AMPtk pipeline.S1 Table. Amplicon sizes**  
546 **of new primers (ATSF/AITSR) compared to other primers (CF/BR and ITS1/ITS2) obtained**  
547 **by simulated PCR.**

548 **S2 Table. Statistical analysis of detection of individual Trypanosome species in replicate runs.**

549 **S3 Table: Matrix comparison of ASVs and OTUs from simulated data.**

**Colored ranges**

- T. congolense Kilifi
- T. simiae Tsavo II
- T. simiae Tsavo I
- T. simiae
- T. congolense Savannah
- T. congolense Forest
- T. godfreyi I
- T. godfreyi II
- T. brucei
- T. vivax I
- T. vivax II

**Sampling site**

- Hurungwe; Zimbabwe (WE)
- Rufunsa; Zambia (RUF)
- Kafue; Zambia (KAF)

**Bootstrap support**

- Size: 60-100

Tree scale: 1

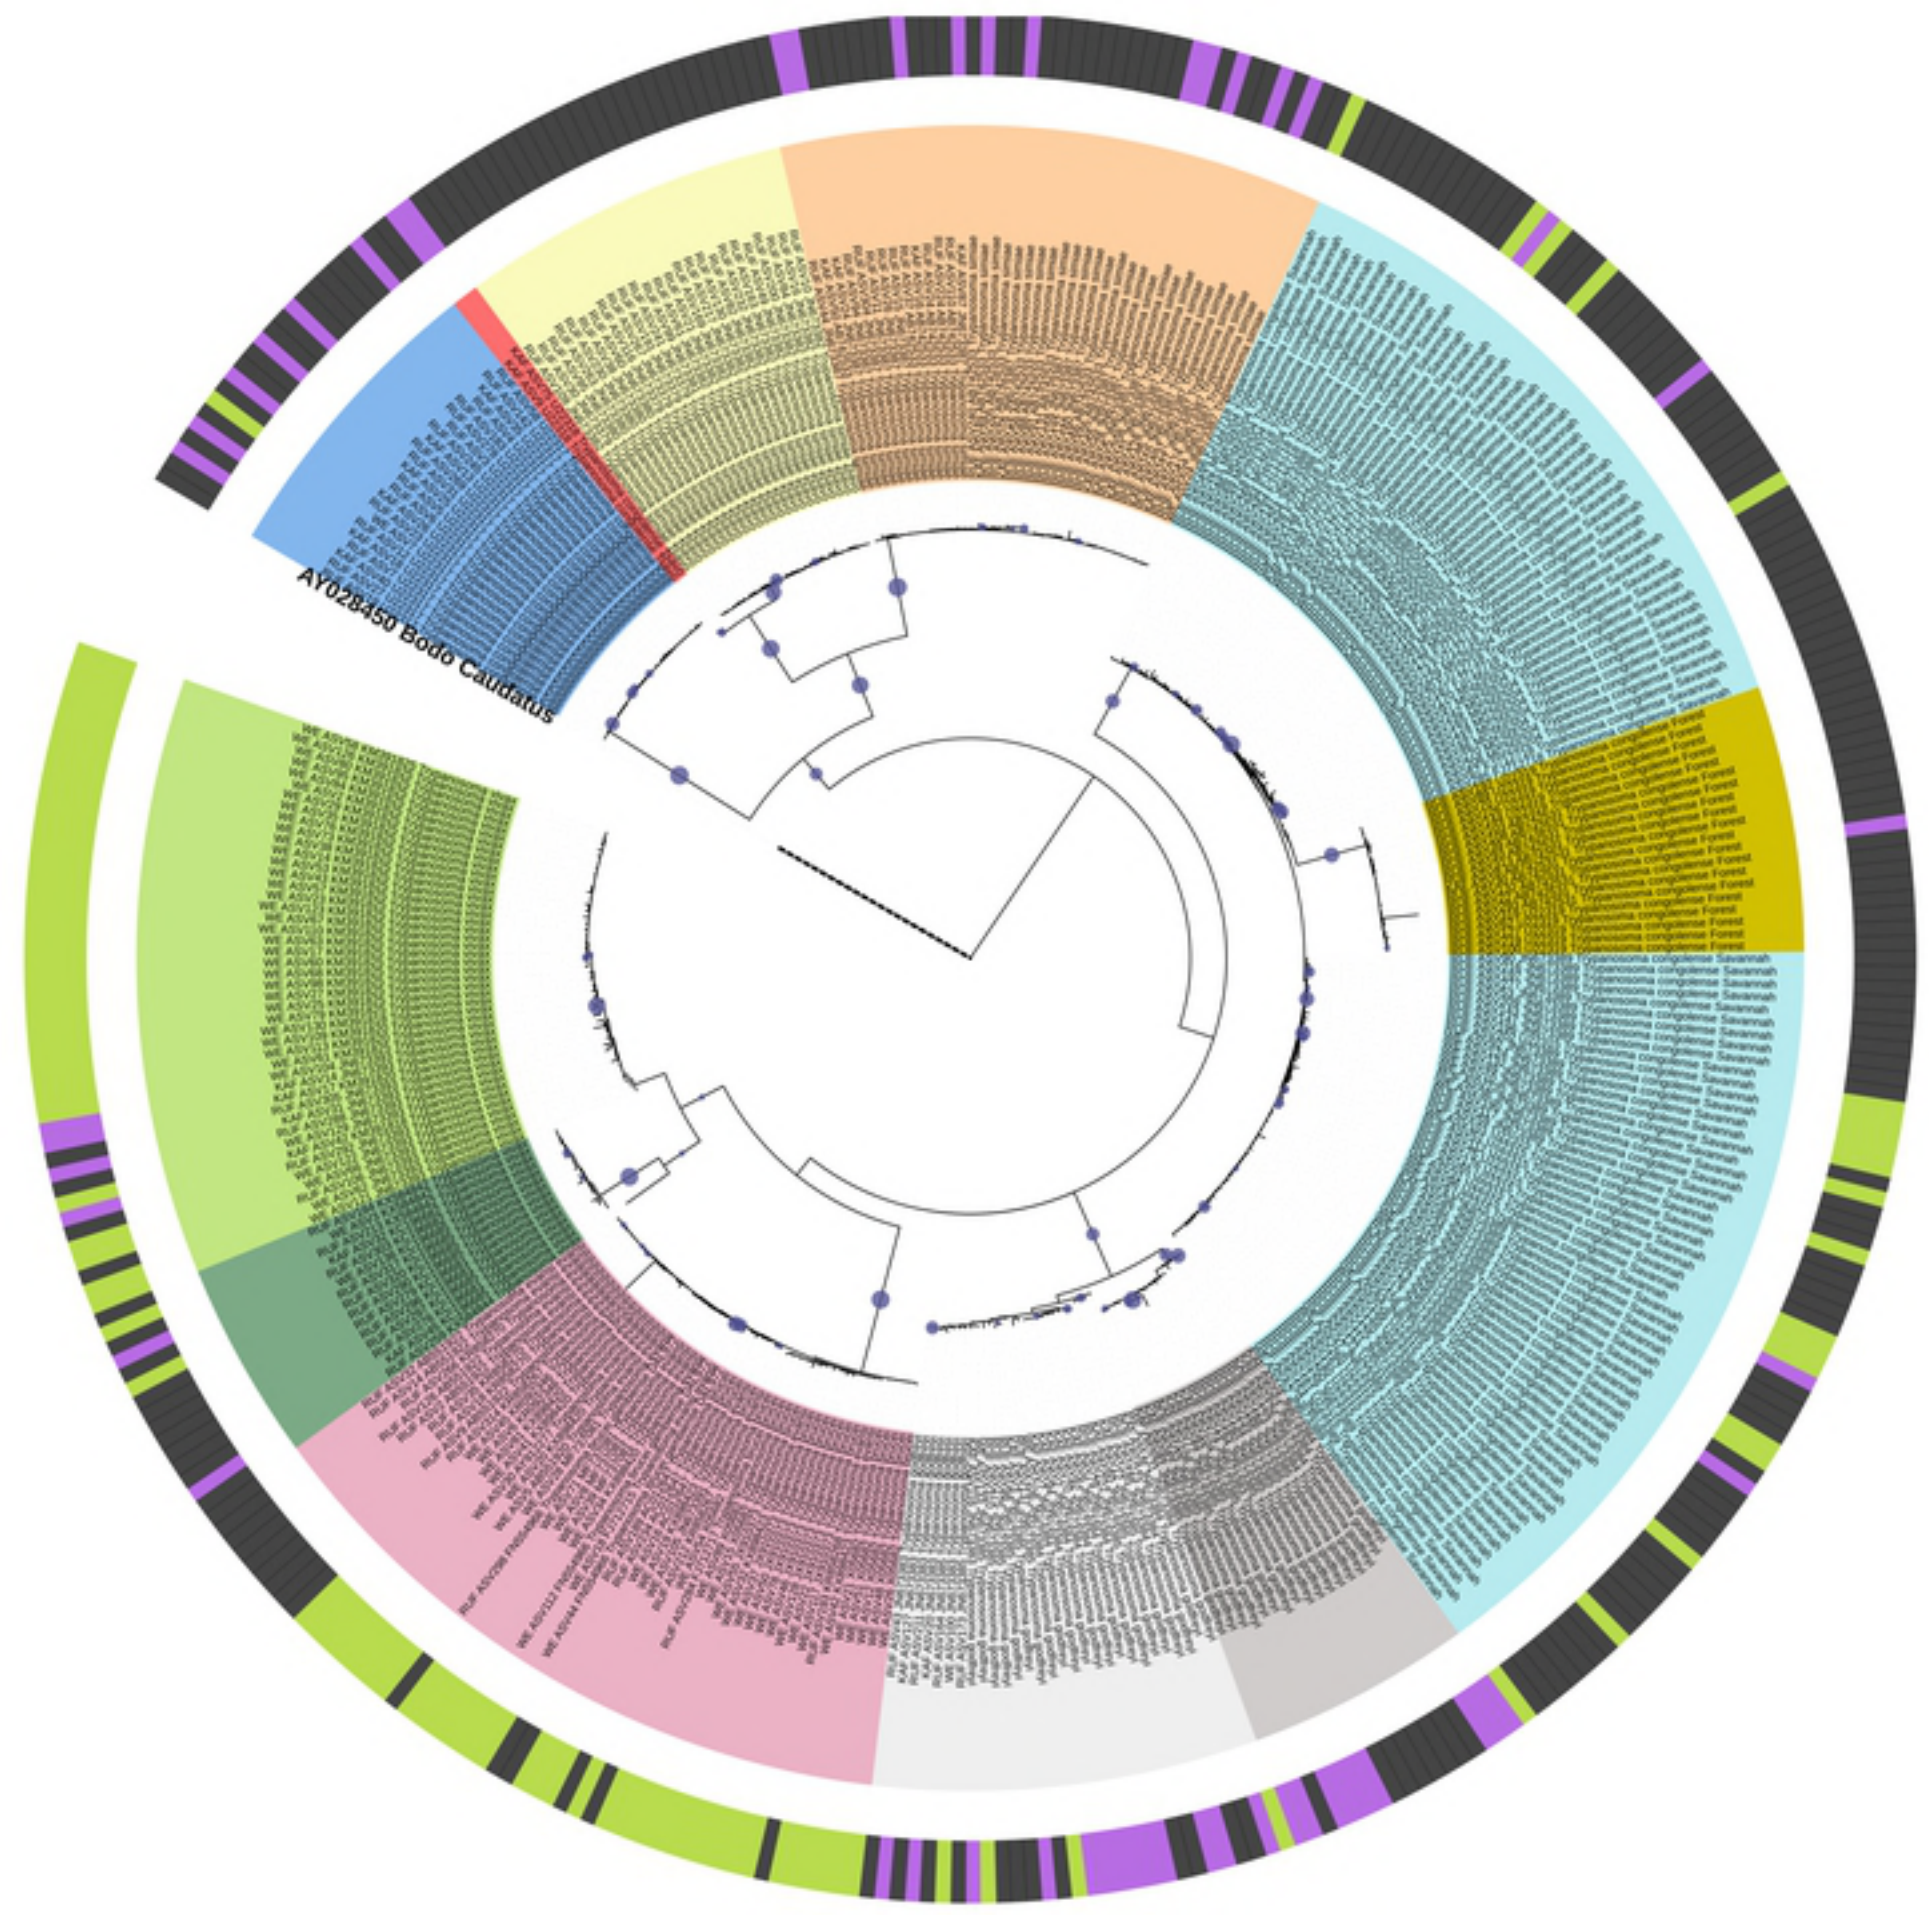



### Kafue, Zambia

Infected = 24  
Non infected = 61

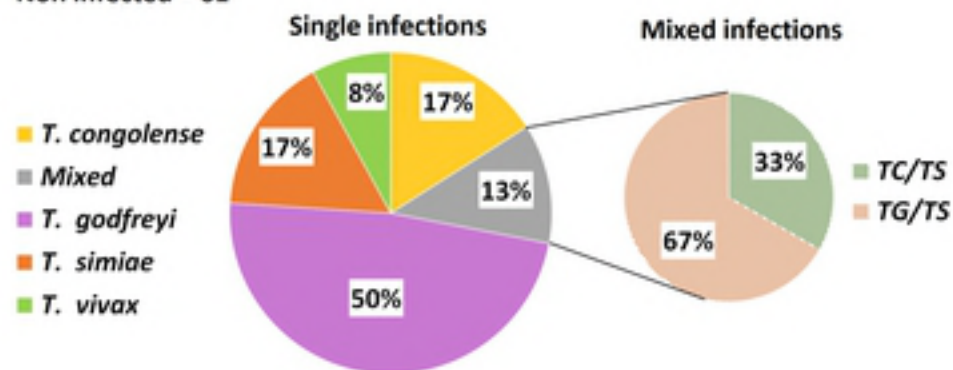

### Rufunsa, Zambia

Infected = 53  
Non infected = 147

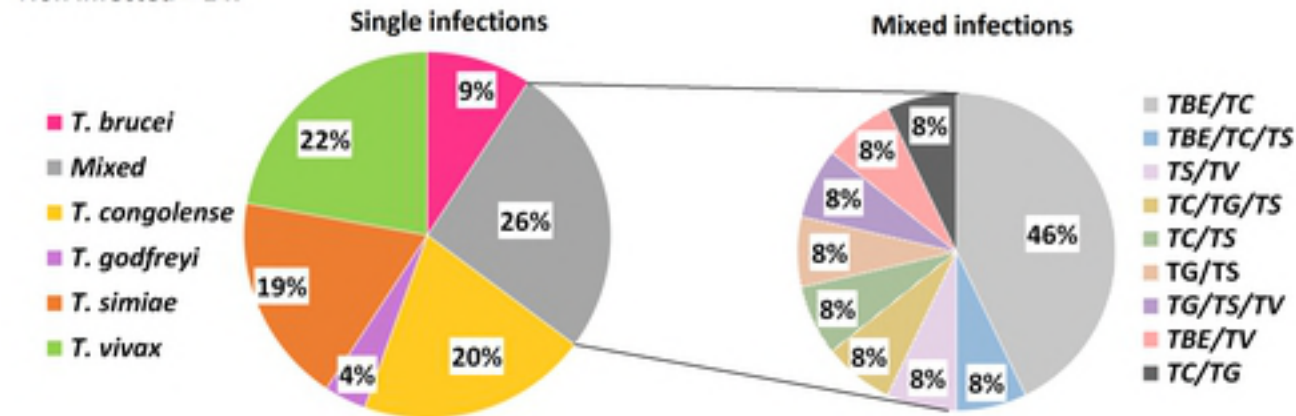

### Infection distribution in female and male tsetse flies

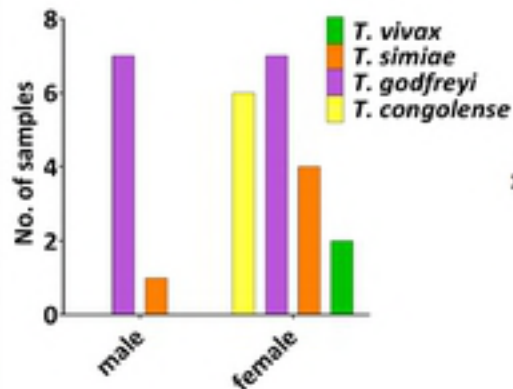

### Infection rates in female and male tsetse flies

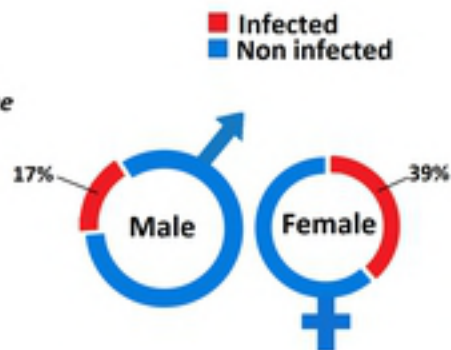

### Hurungwe, Zimbabwe

Infected = 64  
Non infected = 124

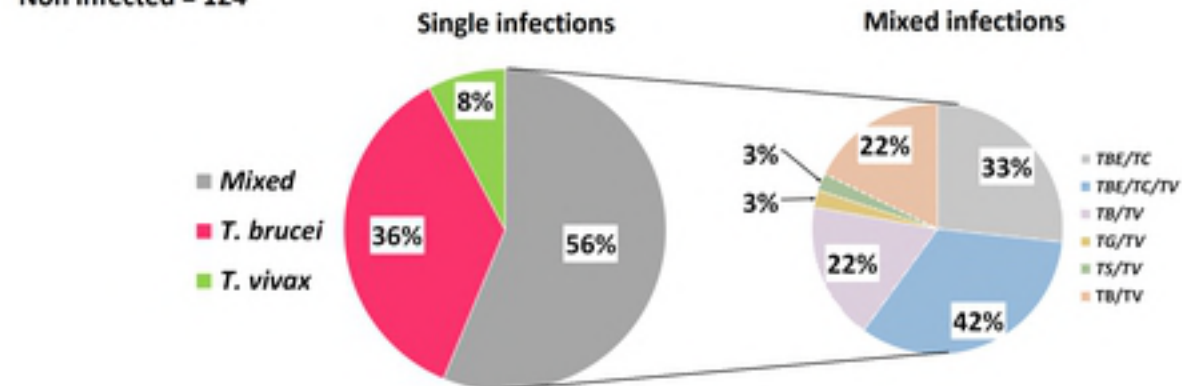

## AMPTK PIPELINE

### INPUT

Fastq files  
Forward & Reverse  
reads

#### amptk illumina

*(merge PE reads, length  
filter, remove PhiX reads  
& strip primers)*

#### amptk filter

*(sorting ASVs, normalize  
ASV table & auto-detect  
index bleeding)*

#### amptk dada2

*(quality filter @ maxEE  
<8, run DADA2  
denoising, obtain ASVs &  
map reads to ASVs)*

#### amptk lulu

*(pairwise identity of ASVs  
@ 84%, filter ASVs by  
concurrence &  
abundance)*

#### amptk taxonomy

*(assign taxonomy)*

#### Remote blastn (NCBI database) of ASVs

*(percentage identity  
> 85%, alignment coverage of hit to  
query > 95% & pick best hit)*

#### blast hit processing

*(custom rename ASVs to specific  
species and sub-type, remove 0  
hits, create amptk compatible  
format taxonomy file)*

Biom file

ASV (OTU) Table

ASV sequences  
(FASTA file)

### OUTPUT

A

Gel analysis

## Run A

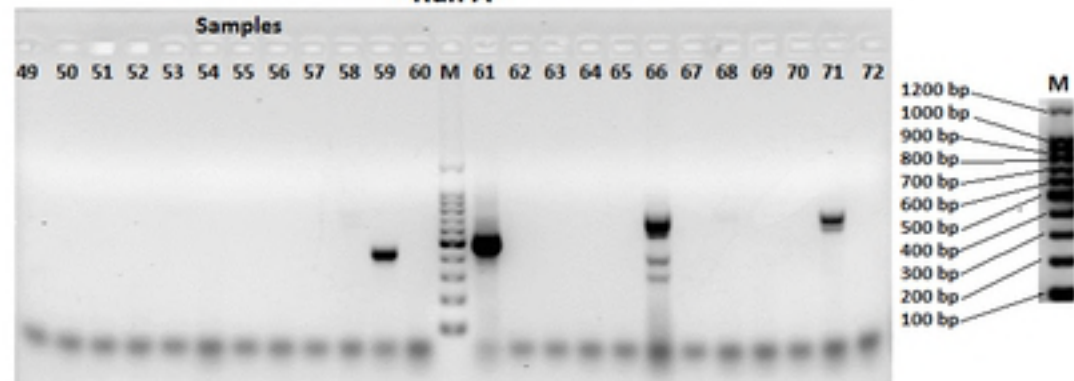

## Run B

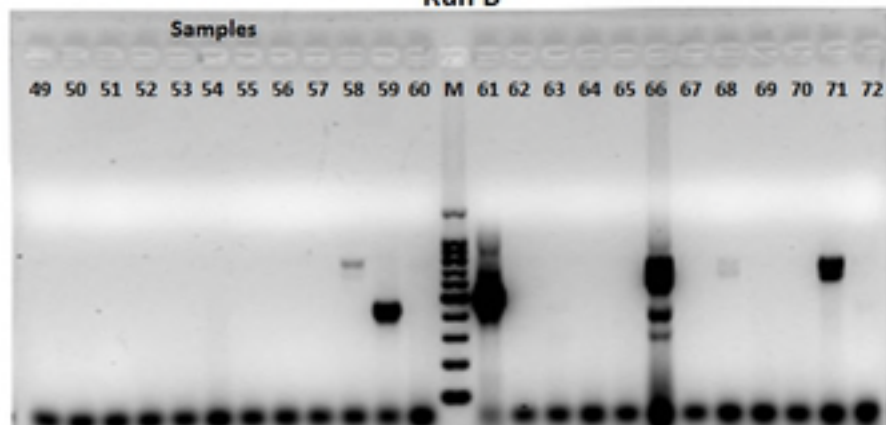

B

Sequence analysis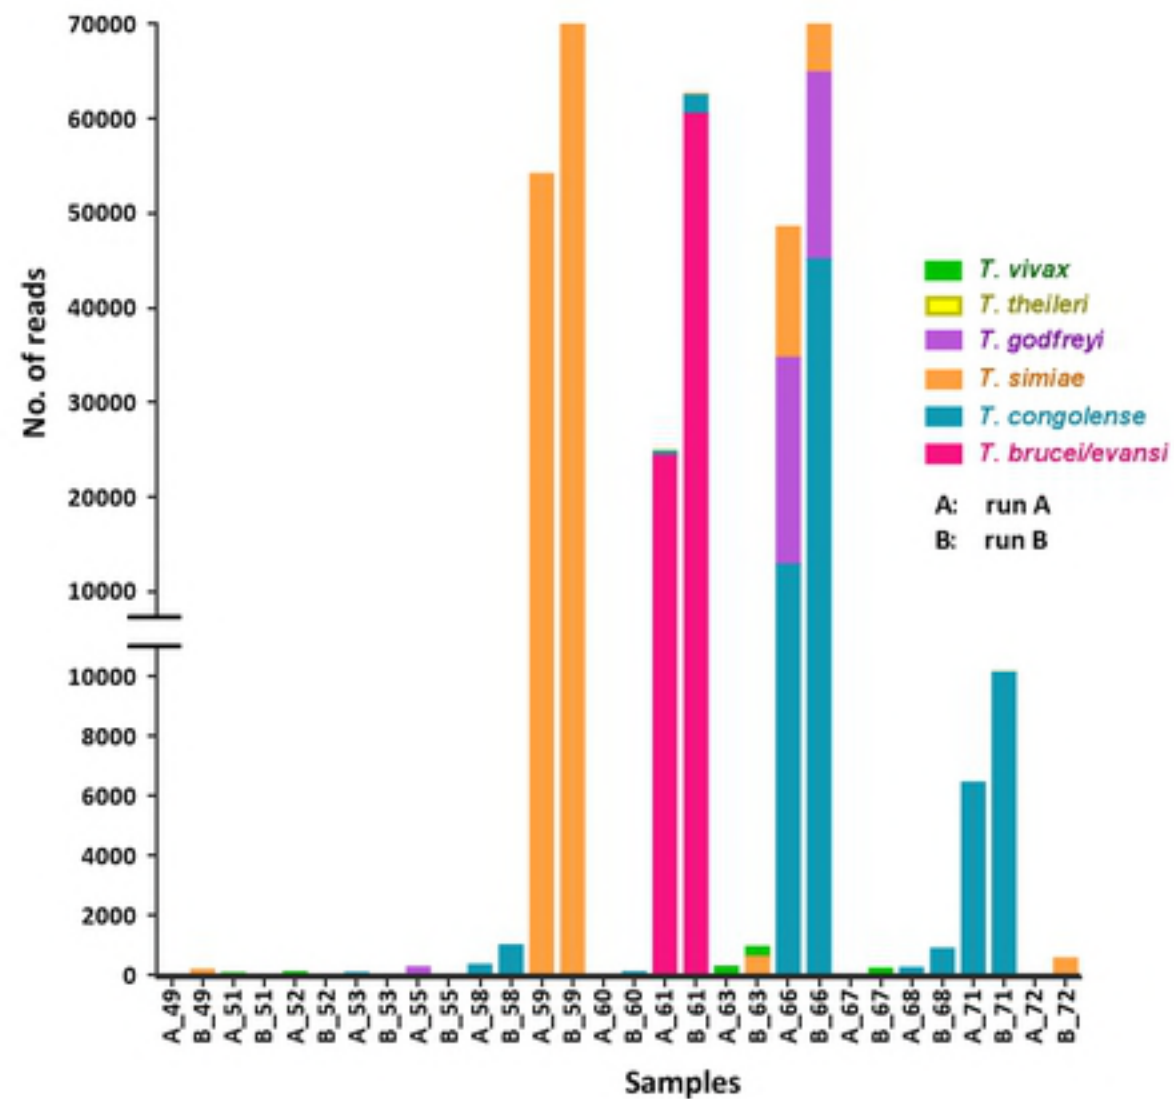

A

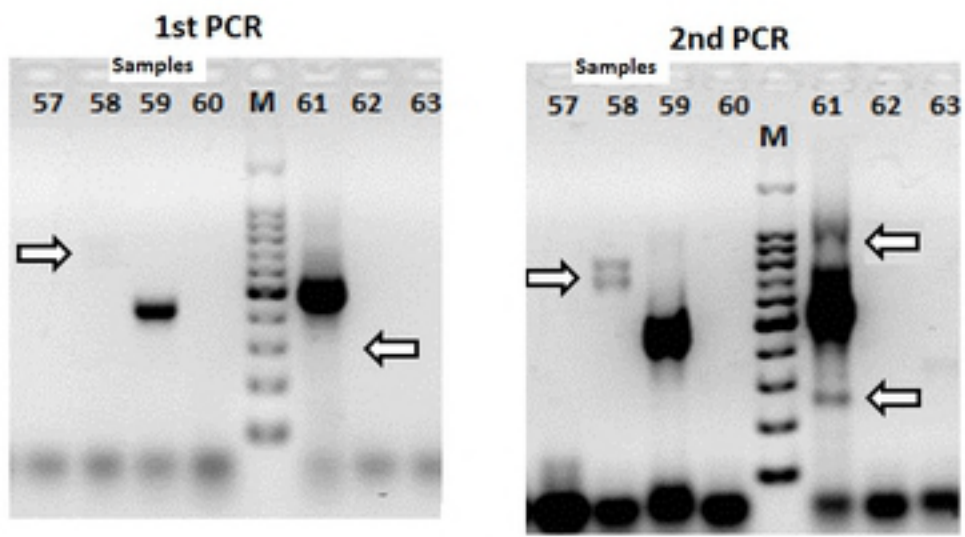

B

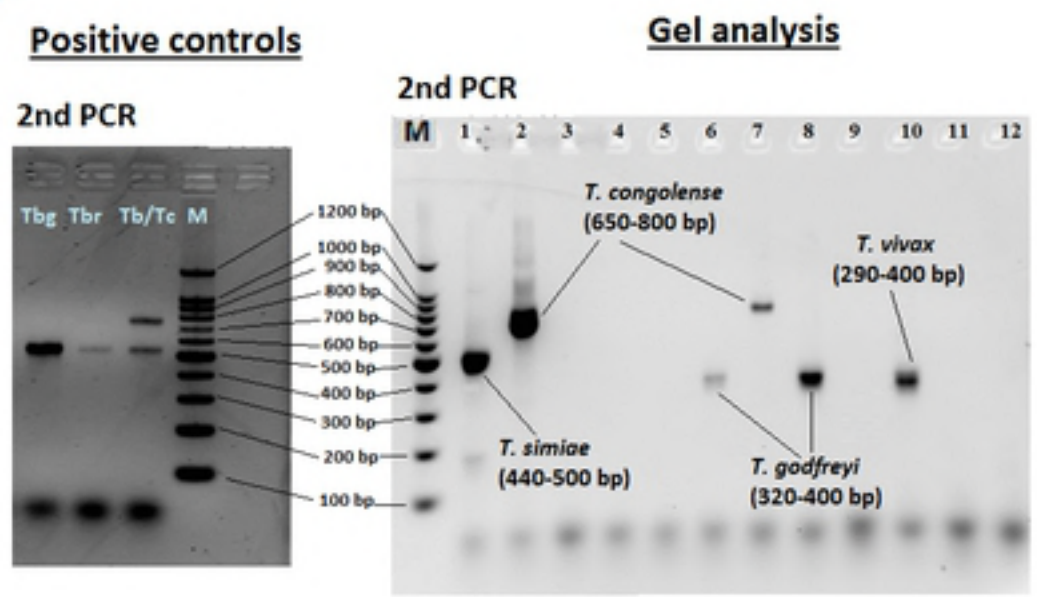

**Amplicon sequence analysis**

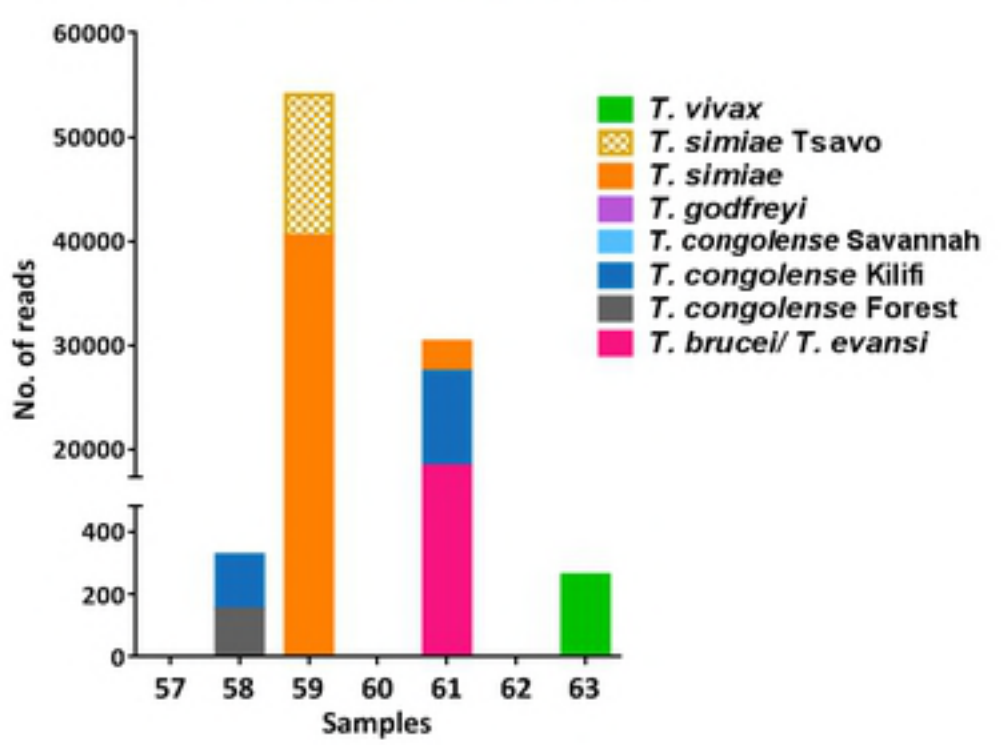

**Amplicon sequence analysis**

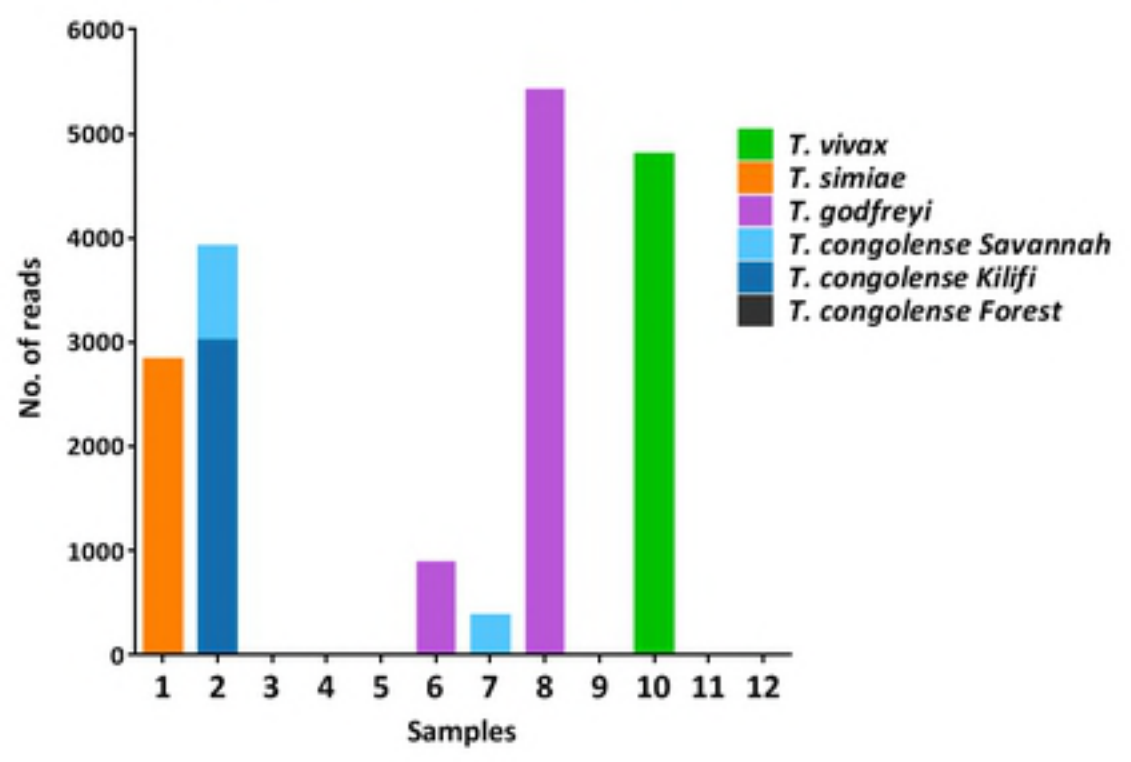



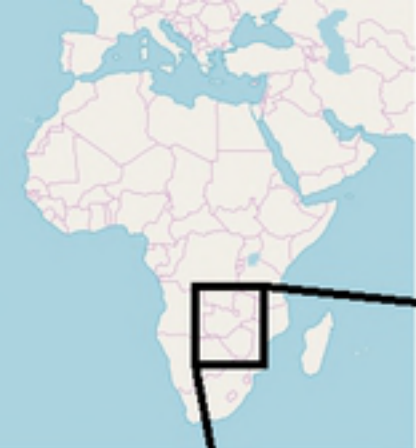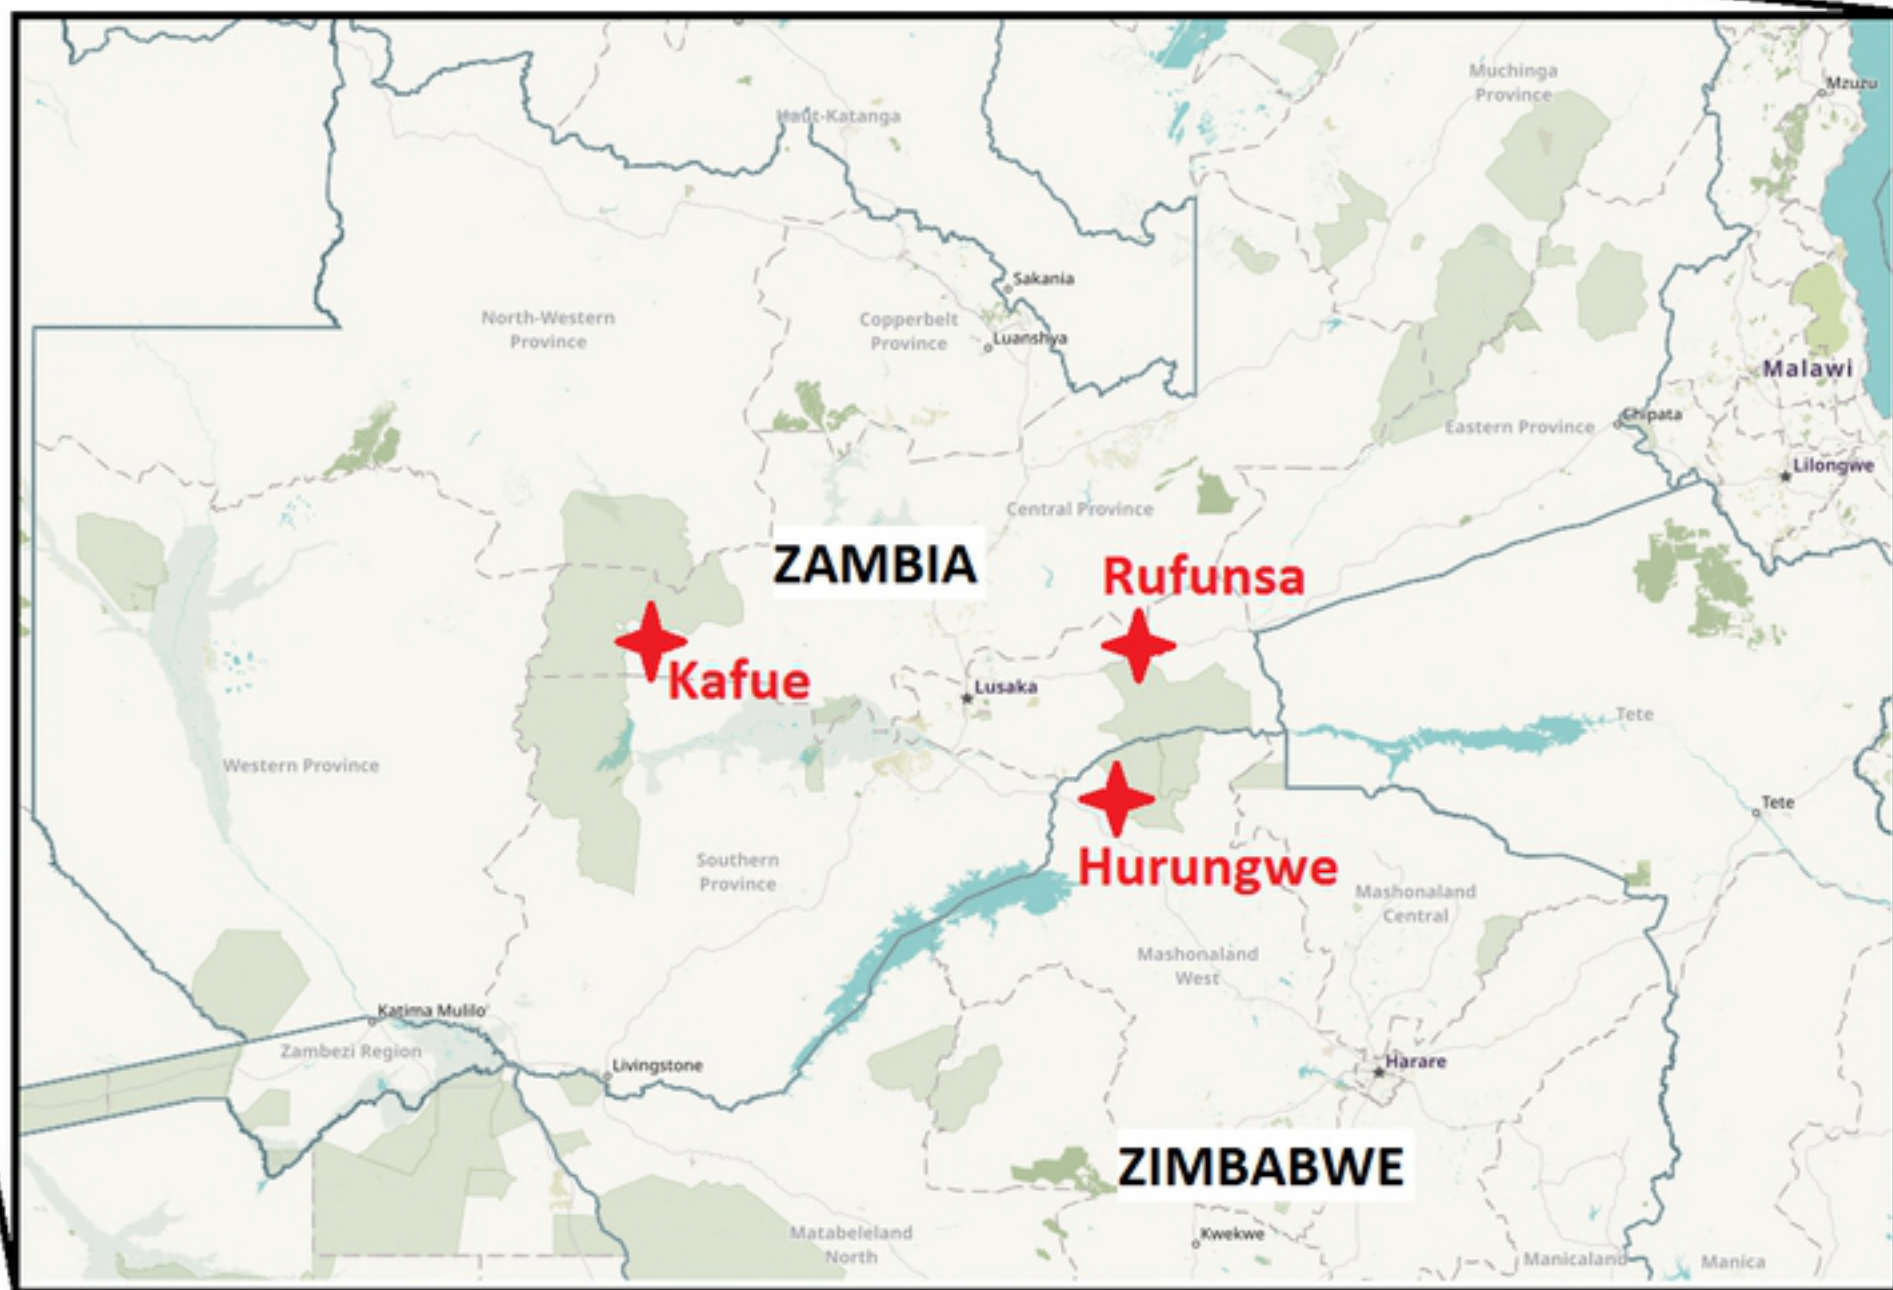

Source: http://biorxiv.org/content/10.1101/418343v1.full.pdf
